# Supplementary material for: Three-dimensionally interconnected Si frameworks derived from natural halloysite clay: a high-capacity anode material for lithium-ion batteries
Source: Royal Society of Chemistry journal article supplement (doi:10.1039/c8dt01242c), 2018-01-01
Supplement: c8dt01242c1.pdf [file c8dt01242c1.pdf]

## Supporting Information

### **Three-dimensionally Interconnected Si Frameworks Derived from Natural Halloysite Clay: High-Capacity Anode Material for Lithium-ion Battery**

Hao Wan,<sup>1,2,†</sup> Hao Xiong,<sup>1,2,†</sup> Xiaohe Liu,<sup>1,\*</sup> Gen Chen,<sup>1</sup> Ning Zhang,<sup>1</sup> Haidong Wang,<sup>2,\*</sup>  
Renzhi Ma<sup>3,\*</sup> & Guanzhou Qiu<sup>2</sup>

<sup>1</sup> State Key Laboratory of Powder Metallurgy and School of Materials Science and Engineering, Central South University, Changsha, Hunan 410083, China. Email: liuxh@csu.edu.cn

<sup>2</sup> School of Minerals Processing and Bioengineering, Central South University, Changsha, Hunan 410083, P. R. China. Email: joew@csu.edu.cn

<sup>3</sup> International Center for Materials Nanoarchitectonics (WPI-MANA), National Institute for Materials Science (NIMS), 1-1 Namiki, Tsukuba, Ibaraki 305-0044, Japan. Email: MA.Renzhi@nims.go.jp

† These authors equally contributed to this work.

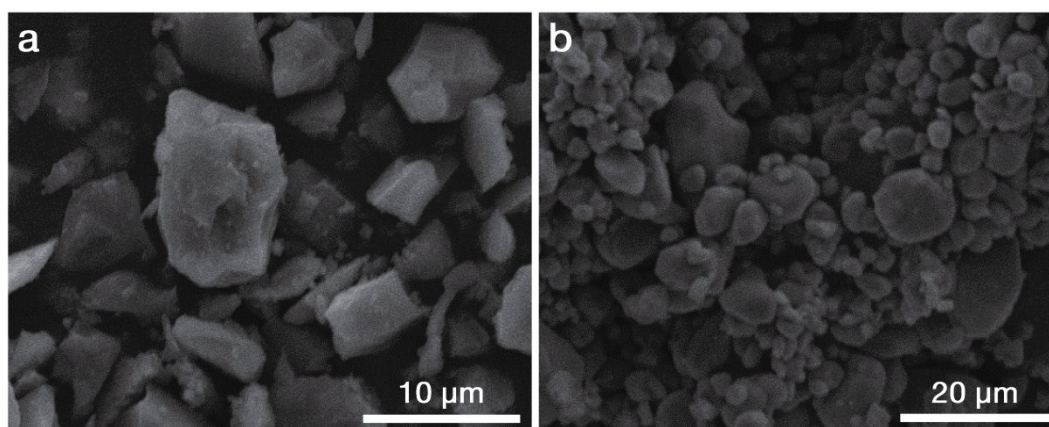

**Figure S1** SEM images of commercial (a) Si and (b) LiCoO<sub>2</sub> electrode materials.

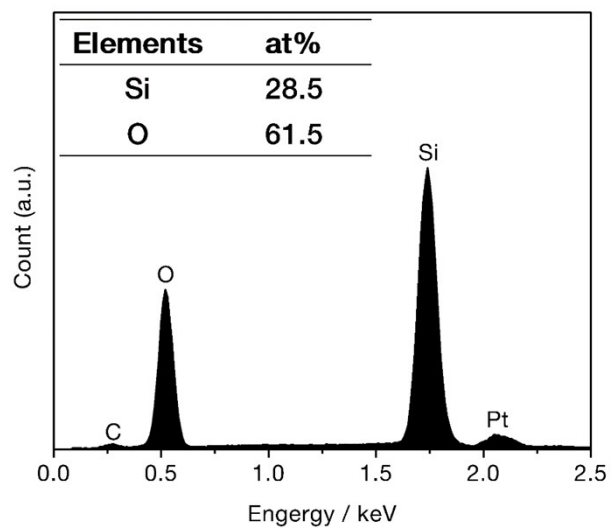

**Figure S2.** EDS pattern of acid-treated halloysite clay.

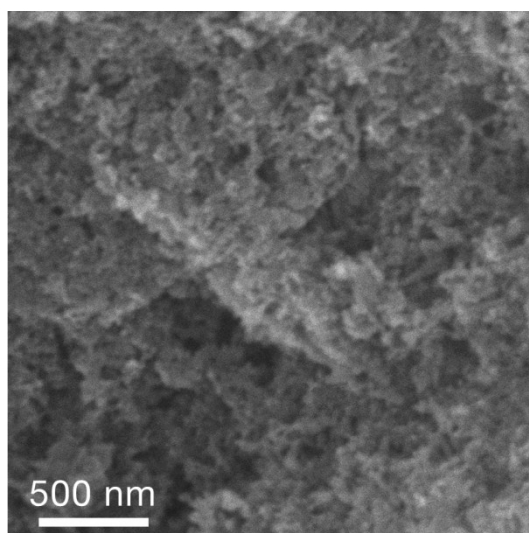

**Figure S3.** SEM image of the as-prepared 3D-interconnected Si frameworks.

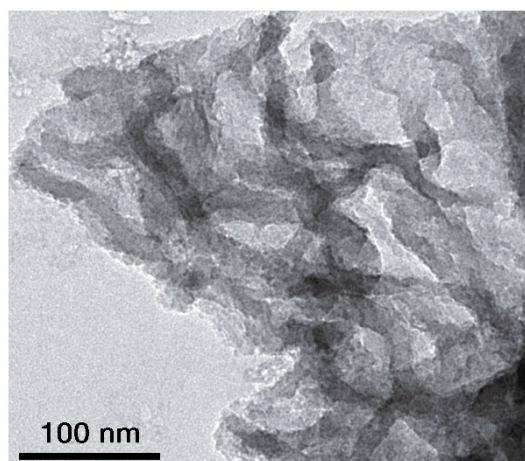

**Figure S4.** TEM image of the as-prepared Si frameworks after 20 cycles at the current density of  $0.1 \text{ A g}^{-1}$ .

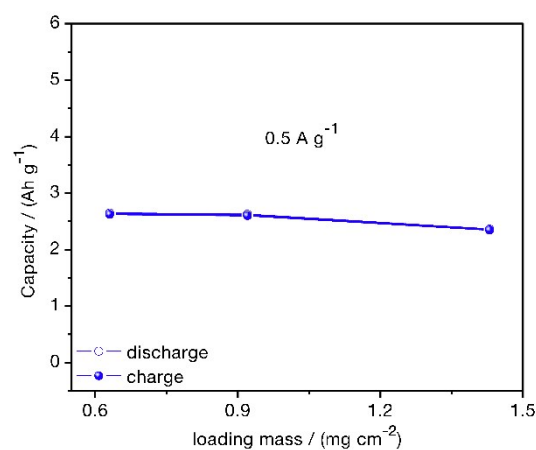

**Figure S5.** The specific capacity after 10 cycles at a current density of  $0.5 \text{ A g}^{-1}$  for the as-prepared Si frameworks with different active material loading mass. Only a slow decay was observed with the loading mass increased manifold, indicating the great potential in commercial Si anodes.
